# Supplementary material for: Genomic Analysis of Antimicrobial Resistance Genotype-to-Phenotype Agreement in Helicobacter pylori
Source: MDPI journal article supplement (doi:10.3390/microorganisms9010002), 2020-12-22
Supplement: s1 [file s1]

## Supplementary Material

### **Genomic Analysis of Antimicrobial Resistance Genotype-to-Phenotype Agreement in *Helicobacter pylori***

Tal Domanovich-Asor<sup>1</sup>, Yair Motro<sup>1</sup>, Boris Khalfin<sup>1</sup>, Hillary A. Craddock<sup>1</sup>, Avi Peretz<sup>2</sup> and Jacob Moran-Gilad<sup>1</sup>

<sup>1</sup>*MAGICAL Group, Department of Health Systems Management, Faculty of Health Sciences, Ben-Gurion University of the Negev, Beer-Sheva, Israel*

<sup>2</sup>*Clinical Microbiology Laboratory, Baruch Padeh Medical Center, Poriyah and Azrieli Faculty of Medicine, Bar-Ilan University, Galilee, Israel*

**Running title:** *H. pylori* phenotype-genotype agreement

**Address correspondence to:**

Prof. Jacob Moran-Gilad, MD MPH

Dept. of Health Systems Management, Faculty of Health Sciences,

Ben Gurion University of the Negev

POB 653, Beer Sheva, 8410501 Israel

Email: [giladko@post.bgu.ac.il](mailto:giladko@post.bgu.ac.il)

**Figure S1.**

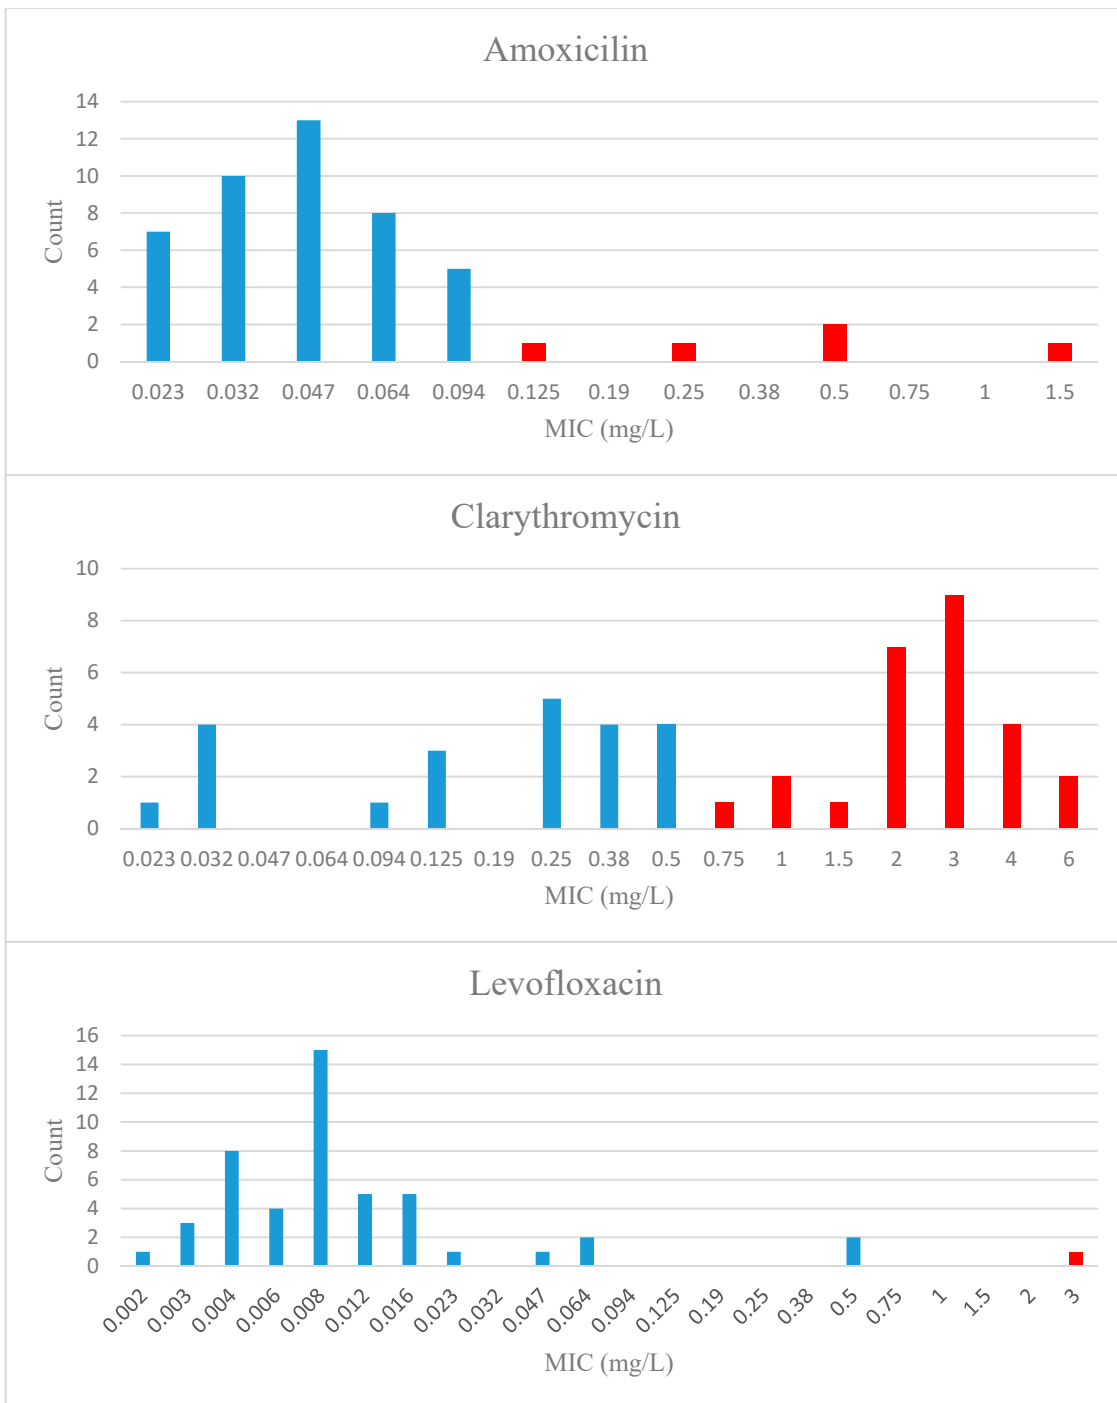

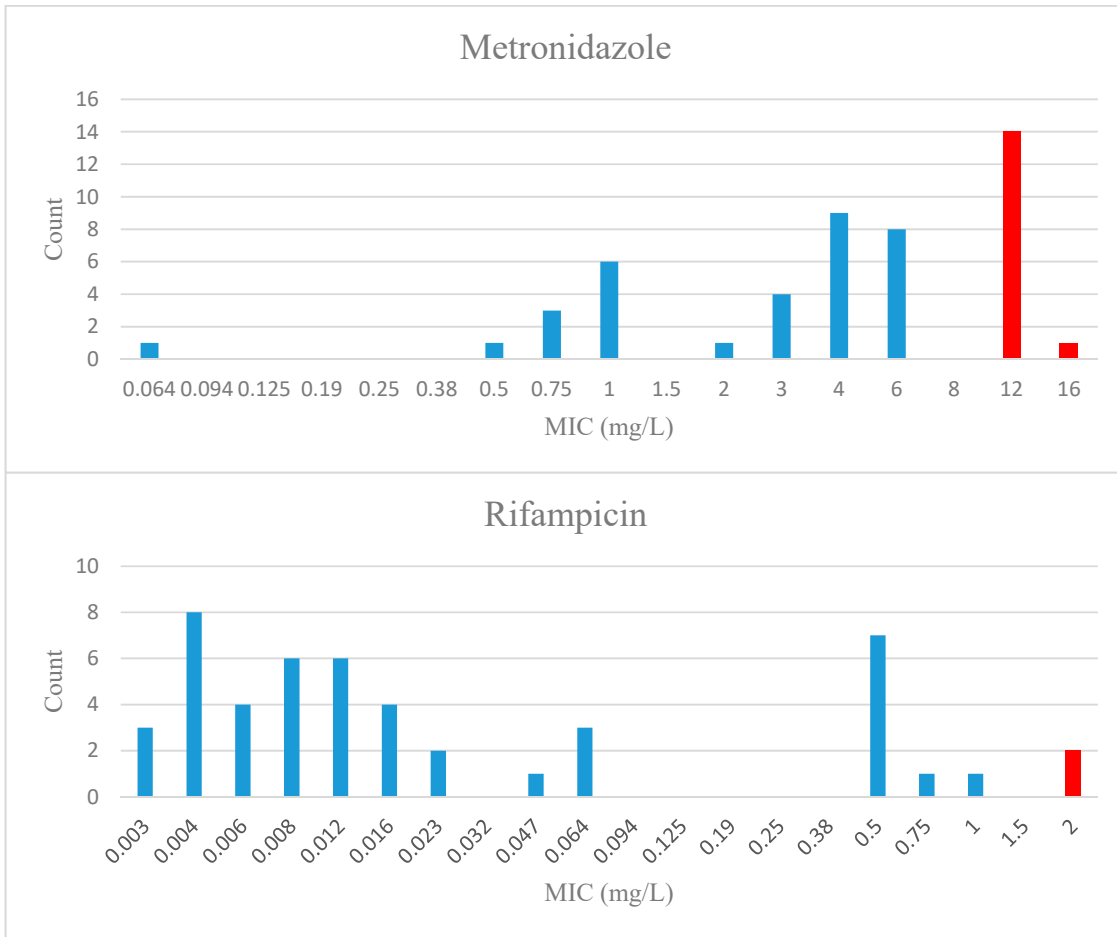

**Supplementary Figure 1.** Minimum inhibitory concentration (MIC) value distributions for the 48 Israeli isolates for amoxicillin, clarithromycin, levofloxacin, metronidazole, and rifampicin. Blue bars indicate MIC values which render the isolate susceptible to the particular agent, whereas red bars indicate resistant isolates per BSAC breakpoints.

**Supplementary Table 2.** List of previously described mutations associated with phenotypic resistance in *H. pylori* and mutations observed for the first time in this study.

| Antimicrobial | Gene            | Mutation   | Reference  |
|---------------|-----------------|------------|------------|
| AMO           | <i>pbp1A</i>    | A69V       | 1          |
|               |                 | S414R      |            |
|               |                 | Y484C      |            |
|               |                 | T541I      |            |
|               |                 | T556S      |            |
|               |                 | N562Y      | 1,2        |
|               |                 | S402G      | 3          |
|               |                 | E406A      |            |
|               |                 | S543R      |            |
|               |                 | S589G      |            |
|               |                 | G595S      |            |
|               |                 | S417T      | 4          |
|               |                 | A369T      |            |
|               |                 | V374L      |            |
|               |                 | L423E      |            |
|               |                 | T593A      |            |
|               |                 | G94E       | This study |
| N461D         |                 |            |            |
| CLA           | <i>23S rRNA</i> | G2141A     | 5          |
|               |                 | A2142G\C   |            |
|               |                 | A2143G\C\T |            |
|               |                 | G2224A     | 6          |
|               |                 | T2182C     | 7          |
|               |                 | T2190C     |            |
|               |                 | C2195T     |            |
|               |                 | A2223G     |            |
|               |                 | G2111A     | 8          |
|               |                 | A2115G     |            |
|               |                 | A2144G     |            |
|               |                 | C2147G     |            |
|               |                 | G2172T     | 9          |
|               |                 | G2254T     |            |
|               |                 | C2173T     | This study |
| G2212A        |                 |            |            |
| LEV           | <i>gyrA</i>     | D91Y\G\N   | 10         |
|               |                 | A97V       |            |
|               |                 | A88V       |            |
|               |                 | N87K\I\Y   | 10,11      |
|               |                 | D86N       | 11         |
|               |                 | R140K      | 12         |

|       |             |       |       |
|-------|-------------|-------|-------|
|       |             | D192N | 13    |
|       |             | M191I |       |
|       |             | V199A |       |
|       |             | G208E |       |
|       |             | I234V |       |
|       |             | A272G |       |
|       |             | H354R |       |
|       |             | R397Q |       |
|       |             | N495S |       |
|       |             | I498T |       |
|       |             | Y513H |       |
|       |             | A524V |       |
|       |             | D610N |       |
|       |             | E632G |       |
|       |             | S633G |       |
|       |             | S652G |       |
|       |             | E679D |       |
|       |             | K694R |       |
|       |             | G733E |       |
|       |             | M803V |       |
| D143E | 14          |       |       |
| A207T |             |       |       |
| E214K |             |       |       |
| T239M | This study  |       |       |
| MET   | <i>rdxA</i> | H25R  | 13    |
|       |             | S30R  |       |
|       |             | P44L  |       |
|       |             | S45R  |       |
|       |             | V111A |       |
|       |             | A183V |       |
|       |             | L185Y |       |
|       |             | L188V |       |
|       |             | Y47C  | 15    |
|       |             | K63E  |       |
|       |             | A143T |       |
|       |             | G145V |       |
|       |             | R200G |       |
|       |             | P51L  | 16    |
|       |             | A67V  | 16    |
|       |             | D157N | 17    |
|       |             | G189C | 17,18 |
| T49K  | 19          |       |       |
| Y26V  | 20          |       |       |
| A37V  |             |       |       |

|          |             |            |       |
|----------|-------------|------------|-------|
|          |             | A40P       |       |
|          |             | K64N       |       |
|          |             | R90K       |       |
|          |             | L153-stop  |       |
|          |             | V172I      |       |
|          |             | Q50-stop   | 20,21 |
|          |             | R16H\C     | 18    |
|          |             | C19Y       |       |
|          |             | T31E       |       |
|          |             | H97Y\T     |       |
|          |             | S108A      |       |
|          |             | A118T/s    |       |
|          |             | R131K      | 21    |
|          |             | D59N       |       |
|          |             | V204I      |       |
|          | A206T       |            |       |
|          | V86I        | This study |       |
|          | P96L        |            |       |
|          | G122R       |            |       |
|          | <i>frxA</i> | A32V       | 20    |
| W68-stop |             |            |       |
| A152V    |             |            |       |
| A153V    |             | 21         |       |
| F72S     |             |            |       |
| G73S     |             |            |       |
| C193S    |             |            |       |
| A70T     | This study  |            |       |
| A138V    |             |            |       |

|     |             |             |            |
|-----|-------------|-------------|------------|
| RIF | <i>rpoB</i> | L525P       | 22         |
|     |             | S545L       |            |
|     |             | I586L\N     |            |
|     |             | V149F       | 23         |
|     |             | Q527R\K     | 24         |
|     |             | D530V/Y/G/F |            |
|     |             | H540N\Y     | 25         |
|     |             | R701H       |            |
|     |             | L547F       | 26         |
|     |             | V783M       | This study |

additional variants references; 27,28,29,30,31,32,33,34,35,36,37

**Supplementary Table 3. Genotype to phenotype concordance of Israeli isolates (n=48) with respect to published mutations known to confer resistance and novel point mutations**

| All perfectly aligned Israeli isolates<br>MIC values | <i>pbp1A</i> |                               | 23s <i>rRNA</i> |                               | <i>gyrA</i> |                               | <i>rdxA</i> |                                 | <i>frxA</i> |                               | <i>rpoB</i> |                               |
|------------------------------------------------------|--------------|-------------------------------|-----------------|-------------------------------|-------------|-------------------------------|-------------|---------------------------------|-------------|-------------------------------|-------------|-------------------------------|
|                                                      | Isolates     | Isolates with novel mutations | Isolates        | Isolates with novel mutations | Isolates    | Isolates with novel mutations | Isolates    | Isolates with novel mutations   | Isolates    | Isolates with novel mutations | Isolates    | Isolates with novel mutations |
| 16                                                   | -            | -                             | -               | -                             | -           | -                             | <b>1</b>    | -                               | <b>1</b>    | -                             | -           | -                             |
| 12                                                   | -            | -                             | -               | -                             | -           | -                             | <b>10</b>   | <b>3</b><br>(V86I, G122R, P96L) | <b>8</b>    | <b>2</b><br>(A70T, A138V)     | -           | -                             |
| 6                                                    | -            | -                             | <b>1</b>        | 1<br>(G2212A)                 | -           | -                             | 6           | 1<br>(V86I)                     | 6           | -                             | -           | -                             |
| 4                                                    | -            | -                             | <b>3</b>        | -                             | -           | -                             | 7           | 1<br>(P96L)                     | 5           | -                             | -           | -                             |
| 3                                                    | -            | -                             | <b>8</b>        | 1<br>(C2173T)                 | -           | <b>1</b><br>(T239M)           | 4           | -                               | 4           | -                             | -           | -                             |
| 2                                                    | -            | -                             | <b>5</b>        | 1<br>(G2212A)                 | -           | -                             | 1           | -                               | -           | -                             | <b>1</b>    | <b>1</b><br>(D530V, R701H)    |
| 1.5                                                  | -            | <b>1</b><br>(G94E N461D)      | <b>1</b>        | -                             | -           | -                             | -           | -                               | -           | -                             | -           | -                             |
| 1                                                    | -            | -                             | <b>2</b>        | -                             | -           | -                             | 4           | -                               | 1           | -                             | 1           | -                             |
| 0.75                                                 | -            | -                             | 1               | -                             | -           | -                             | 3           | -                               | 1           | -                             | 1           | -                             |
| 0.5                                                  | <b>2*</b>    | -                             | 4               | -                             | 2           | -                             | 1           | -                               | 1           | -                             | 7           | -                             |
| 0.38                                                 | -            | -                             | 4               | -                             | -           | -                             | -           | -                               | -           | -                             | -           | -                             |
| 0.25                                                 | -            | -                             | 4               | -                             | -           | -                             | -           | -                               | -           | -                             | -           | -                             |
| 0.125                                                | -            | -                             | 3               | -                             | -           | -                             | -           | -                               | -           | -                             | -           | -                             |
| 0.094                                                | 4            | -                             | 1               | -                             | -           | -                             | -           | -                               | -           | -                             | -           | -                             |
| 0.064                                                | 6            | 1<br>(N461D)                  | -               | -                             | 2           | -                             | 1           | -                               | 1           | -                             | 3           | -                             |
| 0.047                                                | 12           | -                             | -               | -                             | 1           | -                             | -           | -                               | -           | -                             | 1           | -                             |

|       |    |   |    |               |    |   |    |   |    |   |    |              |
|-------|----|---|----|---------------|----|---|----|---|----|---|----|--------------|
| 0.032 | 6  | - | 4  | -             | -  | - | -  | - | -  | - | -  | -            |
| 0.023 | 5  | - | -  | 1<br>(G2212A) | 1  | - | -  | - | -  | - | 2  | -            |
| 0.016 | -  | - | -  | -             | 5  | - | -  | - | -  | - | 4  | -            |
| 0.012 | -  | - | -  | -             | 5  | - | -  | - | -  | - | 4  | 1<br>(V783M) |
| 0.008 | -  | - | -  | -             | 14 | - | -  | - | -  | - | 6  | -            |
| 0.006 | -  | - | -  | -             | 4  | - | -  | - | -  | - | 4  | -            |
| 0.004 | -  | - | -  | -             | 8  | - | -  | - | -  | - | -  | -            |
| 0.003 | -  | - | -  | -             | 3  | - | -  | - | -  | - | -  | -            |
| 0.002 | -  | - | -  | -             | 1  | - | -  | - | -  | - | -  | -            |
| SUM   | 35 | 2 | 41 | 4             | 46 | 1 | 38 | 5 | 28 | 2 | 34 | 1            |

\*Highlighted numbers in bold refers to phenotypically resistant isolates according to BSAC guidelines.



**Supplementary Table 4.** Mutations observed in the *pbp1A* gene (previously described\* and novel mutations). After imperfect alignments were omitted, 37 of the total 48 sequences remained for analysis.

| Mutation | WT      | Published mutations                         |                                     |            | New variant | New mutation | Reference |
|----------|---------|---------------------------------------------|-------------------------------------|------------|-------------|--------------|-----------|
|          |         | Likely associated with resistance phenotype | Additional variants of the mutation |            |             |              |           |
| A69V     | A<br>37 | V<br>0                                      |                                     |            |             | 1            |           |
| A369T    | A<br>36 | T<br>1                                      |                                     |            |             | 3            |           |
| V374L    | V<br>37 | L<br>0                                      |                                     |            |             | 3            |           |
| S402G    | S<br>19 | G<br>0                                      |                                     | I<br>0     |             | 2            |           |
| E406A    | E<br>4  | A<br>32                                     | K V T<br>0 0 1                      | M Q<br>0 0 |             | 2            |           |
| S414R    | S<br>36 | R<br>0                                      |                                     | N<br>1     |             | 1            |           |
| S417T    | S<br>35 | T<br>2                                      |                                     |            |             | 2            |           |
| L423E    | L<br>37 | E<br>0                                      |                                     |            |             | 3            |           |
| Y484C    | Y<br>37 | C<br>0                                      |                                     |            |             | 1            |           |
| T541I    | T<br>37 | I<br>0                                      |                                     |            |             | 1            |           |
| S543R    | S<br>15 | R<br>20                                     | H N T<br>2 0 0                      |            |             | 2            |           |
| T556S    | T<br>37 | S<br>0                                      |                                     |            |             | 1            |           |
| N562Y    | N<br>34 | Y<br>3                                      | D<br>0                              | H G<br>0 0 |             | 1,2          |           |
| S589G    | S       | G                                           |                                     | D          |             | 2            |           |

|         |         |         |        |        |        |            |
|---------|---------|---------|--------|--------|--------|------------|
|         | 21      | 16      |        | 0      |        |            |
| T593A** | T<br>14 | A<br>20 | G<br>0 | S<br>2 | P<br>0 | 3          |
| G595S   | G<br>8  | S<br>25 |        | A<br>4 |        | 2          |
| G94E    | G<br>35 |         |        |        | E<br>1 | This study |
| N461D   | N<br>32 |         |        |        | D<br>5 | This study |

\*Observed variants not present in the mutation library were searched against the NCBI database to determine if they were previously described (but not associated with resistance), and if found in NCBI they were described as “additional variants of the mutation”. Variants that were not detected previously in literature in the context of antibiotic resistance were referred to as “new variants.”

\*\*36 out of 48 alignments were used in the analysis of this mutation

**Supplementary Table 5.** Mutations observed in the 23s *rRNA* gene (previously described in the literature\* and novel mutations). After imperfect alignments were omitted, 45 of the total 48 sequences remained for analysis.

| Mutation   | WT      | Published mutations                         |        |        | New mutation | Reference |
|------------|---------|---------------------------------------------|--------|--------|--------------|-----------|
|            |         | Likely associated with resistance phenotype |        |        |              |           |
| G2111A     | G<br>45 | A<br>0                                      |        |        |              | 8         |
| A2115G     | A<br>45 | G<br>0                                      |        |        |              | 8         |
| G2141A     | G<br>45 | A<br>0                                      |        |        |              | 5         |
| A2142G\C   | A<br>44 | G<br>1                                      | C<br>0 |        |              | 5         |
| A2143G\C\T | A<br>28 | G<br>17                                     | C<br>0 | T<br>0 |              | 5         |
| A2144G     | A<br>45 | G<br>0                                      |        |        |              | 8         |
| C2147G     | C<br>45 | G<br>0                                      |        |        |              | 8         |
| G2172T     | G<br>45 | T<br>0                                      |        |        |              | 9         |
| T2182C     | T<br>43 | C<br>2                                      |        |        |              | 7         |
| T2190C     | T<br>45 | C<br>0                                      |        |        |              | 7         |
| C2195T     | C<br>45 | T<br>0                                      |        |        |              | 7         |
| A2223G     | A<br>45 | G<br>0                                      |        |        |              | 7         |
| G2224A     | G<br>45 | A<br>0                                      |        |        |              | 6         |
| G2254T     | G       | T                                           |        |        |              | 9         |

|        |    |   |   |            |
|--------|----|---|---|------------|
|        | 45 | 0 |   |            |
| C2173T | C  |   | T | This study |
|        | 44 |   | 1 |            |
| G2212A | G  |   | A | This study |
|        | 42 |   | 3 |            |

\*Observed variants not present in the mutation library were searched against the NCBI database to determine if they were previously described (but not associated with resistance), and if found in NCBI they were described as “additional variants of the mutation”. Variants that were not detected previously in literature in the context of antibiotic resistance were referred to as “new variants.”

**Supplementary Table 6.** Mutations observed in the *gyrA* gene (previously described\* and novel mutations). After imperfect alignments were omitted, 47 of the total 48 sequences remained for analysis.

| Mutation | WT      | Published mutations                         |        |                                     | New variant | New mutation | Reference |        |
|----------|---------|---------------------------------------------|--------|-------------------------------------|-------------|--------------|-----------|--------|
|          |         | Likely associated with resistance phenotype |        | Additional variants of the mutation |             |              |           |        |
| D86N     | D<br>47 | N<br>0                                      |        |                                     |             |              | 11        |        |
| N87K\I\Y | N<br>43 | K<br>2                                      | I<br>1 | Y<br>0                              | T<br>1      | S<br>0       | H<br>0    | 10, 11 |
| A88V     | A<br>47 | V<br>0                                      |        | P<br>0                              |             |              | 10        |        |
| D91Y\G\N | D<br>45 | Y<br>0                                      | G<br>0 | N<br>2                              |             |              | 10        |        |
| A97V     | A<br>47 | V<br>0                                      |        |                                     |             |              | 10        |        |
| R140K    | R<br>46 | K<br>1                                      |        |                                     |             |              | 12        |        |
| D143E    | D<br>47 | E<br>0                                      |        |                                     | N<br>0      |              | 14        |        |
| M191I    | M<br>8  | I<br>39                                     |        |                                     | F<br>0      | T<br>0       | 13        |        |
| D192N    | D<br>45 | N<br>2                                      |        |                                     |             |              | 12        |        |
| V199A    | V<br>37 | A<br>10                                     |        | I<br>0                              | M<br>0      | T<br>0       | E<br>0    | 13     |
| A207T    | A<br>46 | T<br>1                                      |        |                                     |             |              | 14        |        |
| G208E    | G<br>1  | E<br>35                                     |        | A<br>11                             | R<br>0      | K<br>0       | Q<br>0    | 13     |
| E214K    | E<br>47 | K<br>0                                      |        |                                     | G<br>0      |              |           | 14     |
| I234V    | I       | V                                           |        |                                     |             |              |           | 13     |

|       |         |         |  |        |        |            |
|-------|---------|---------|--|--------|--------|------------|
|       | 37      | 10      |  |        |        |            |
| A272G | A<br>47 | g<br>0  |  |        |        | 13         |
| H354R | H<br>1  | R<br>43 |  | C<br>3 | S<br>0 | 13         |
| R397Q | R<br>16 | Q<br>31 |  |        |        | 13         |
| N495S | N<br>35 | S<br>12 |  | G<br>0 |        | 13         |
| I498T | I<br>35 | T<br>12 |  | M<br>0 |        | 13         |
| Y513H | Y<br>44 | H<br>3  |  |        |        | 13         |
| A524V | A<br>44 | V<br>3  |  |        |        | 13         |
| D610N | D<br>47 | N<br>0  |  |        |        | 13         |
| E632G | E<br>32 | G<br>15 |  | D<br>0 | S<br>0 | 13         |
| S633G | S<br>37 | G<br>10 |  |        |        | 13         |
| S652G | S<br>35 | G<br>12 |  | D<br>0 | T<br>0 | 13         |
| E679D | E<br>5  | D<br>42 |  | N<br>0 | Y<br>0 | 13         |
| K694R | K<br>27 | R<br>20 |  | S<br>0 |        | 13         |
| G733E | G<br>1  | E<br>46 |  |        |        | 13         |
| M803V | M<br>35 | V<br>12 |  | K<br>0 | I<br>0 | 13         |
| T239M | T<br>46 |         |  |        | M<br>1 | This study |

\*Observed variants not present in the mutation library were searched against the NCBI database to determine if they were previously described (but not associated with resistance), and if found in NCBI they were described as “additional variants of the mutation”. Variants that were not detected previously in literature in the context of antibiotic resistance were referred to as “new variants.”

**Supplemental Table 7.** Mutations observed in the *rdxA* gene (previously described\* and novel mutations). Number of alignments remaining after imperfect alignments were removed is represented in the “N” column.

| Mutation | N  | WT      | Published mutations                         |                                     | New variant | New mutation | Reference |
|----------|----|---------|---------------------------------------------|-------------------------------------|-------------|--------------|-----------|
|          |    |         | Likely associated with resistance phenotype | Additional variants of the mutation |             |              |           |
| R16H\C   | 43 | R<br>41 | H<br>1                                      | C<br>1                              |             |              | 18        |
| C19Y     | 43 | C<br>34 | Y<br>0                                      |                                     | F<br>0      |              | 18        |
| H25R     | 43 | H<br>42 | R<br>1                                      |                                     | Y<br>0      |              | 13        |
| Y26V     | 43 | Y<br>43 | V<br>0                                      |                                     |             |              | 20        |
| S30R     | 43 | S<br>43 | R<br>0                                      |                                     | N<br>0      |              | 13        |
| T31E     | 43 | T<br>37 | E<br>6                                      | A<br>0                              | K<br>0      | G<br>0       | 18        |
| A37V     | 43 | A<br>43 | V<br>0                                      |                                     | S<br>0      | T<br>0       | 20        |
| A40P     | 43 | A<br>43 | p<br>0                                      |                                     | T<br>0      |              | 20        |
| P44L     | 43 | P<br>43 | L<br>0                                      |                                     |             |              | 13        |
| S45R     | 43 | S<br>43 | R<br>0                                      |                                     | N<br>0      |              | 13        |
| Y47C     | 43 | Y<br>43 | C<br>0                                      |                                     |             |              | 15        |
| T49K     | 43 | T<br>43 | K<br>0                                      |                                     |             |              | 19        |
| Q50-stop | 43 | Q<br>43 | stop<br>0                                   |                                     |             |              | 20, 21    |
| P51L     |    | P       | L                                           |                                     |             |              | 39        |



|               |    |         |           |        |        |        |        |        |
|---------------|----|---------|-----------|--------|--------|--------|--------|--------|
|               | 43 | 43      | 0         |        |        |        |        |        |
| D59N          | 43 | D<br>0  | N<br>43   |        |        | S<br>0 |        | 21     |
| K63E          | 43 | K<br>43 | E<br>0    | Q<br>0 |        |        |        | 15     |
| K64N          | 43 | K<br>43 | N<br>0    |        |        | R<br>0 | S<br>0 | 20     |
| A67V          | 43 | A<br>42 | V<br>1    |        |        |        |        | 13     |
| R90K          | 43 | R<br>28 | K<br>14   |        |        | N<br>0 | G<br>0 | S<br>1 |
| H97Y\T        | 43 | H<br>34 | T<br>6    | Y<br>3 |        | I<br>0 | M<br>0 | 18     |
| S108A         | 43 | S<br>41 | A<br>2    |        |        | P<br>0 | T<br>0 | 18     |
| V111A         | 43 | V<br>38 | A<br>5    |        |        | M<br>0 |        | 13     |
| A118T/s       | 43 | A<br>40 | T<br>3    | S<br>0 |        |        |        | 18     |
| R131K         | 43 | R<br>24 | K<br>19   |        |        |        |        | 18     |
| A143T         | 43 | A<br>43 | T<br>0    |        |        |        |        | 15     |
| G145V         | 43 | G<br>43 | V<br>0    | E<br>0 | R<br>0 | W<br>0 | A<br>0 | 15     |
| L153-<br>stop | 43 | L<br>43 | stop<br>0 |        |        |        |        | 20     |
| D157N         | 43 | D<br>43 | N<br>0    |        |        | Y<br>0 | Q<br>0 | G<br>0 |
| V172I         | 43 | V<br>38 | I<br>5    |        |        |        |        | 20     |
| A183V         | 41 | A<br>37 | V<br>4    |        |        | R<br>0 |        | 13     |
| L185Y         | 41 | L<br>41 | Y<br>0    |        |        | K<br>0 |        | 13     |
| L188V         |    | L       | V         |        |        | R      | F      | 13     |

|       |    |         |         |  |        |        |        |        |            |
|-------|----|---------|---------|--|--------|--------|--------|--------|------------|
|       | 41 | 41      | 0       |  | 0      | 0      |        |        |            |
| G189C | 41 | G<br>41 | C<br>0  |  | D<br>0 | I<br>0 | S<br>0 |        | 17, 18     |
| R200G | 41 | R<br>41 | G<br>0  |  | E<br>0 | D<br>0 |        |        | 15         |
| V204I | 41 | V<br>25 | I<br>16 |  | L<br>0 | Q<br>0 | A<br>0 | T<br>0 | 21         |
| A206T | 41 | A<br>41 | T<br>0  |  | Q<br>0 | K<br>0 | L<br>0 | E<br>0 | 21         |
| V86I  | 43 | V<br>41 |         |  |        |        |        | I<br>2 | This study |
| P96L  | 43 | P<br>41 |         |  |        |        |        | L<br>2 | This study |
| G122R | 43 | G<br>40 |         |  | S<br>2 |        |        | R<br>1 | This study |

\*Observed variants not present in the mutation library were searched against the NCBI database to determine if they were previously described (but not associated with resistance), and if found in NCBI they were described as “additional variants of the mutation”. Variants that were not detected previously in literature in the context of antibiotic resistance were referred to as “new variants.”

**Supplementary Table 8.** Mutations observed in the *fixA* gene (previously described\* and novel mutations). After imperfect alignments were omitted, 30 of the total 48 sequences remained for analysis.

| Mutation | WT      | Published mutations                         | New variant     | New mutations | Reference  |
|----------|---------|---------------------------------------------|-----------------|---------------|------------|
|          |         | Likely associated with resistance phenotype |                 |               |            |
| A32V     | A<br>30 | V<br>0                                      | T S<br>0 0      |               | 20         |
| W68-stop | W<br>30 | stop<br>0                                   |                 |               | 20         |
| F72S     | F<br>30 | S<br>0                                      |                 |               | 21         |
| G73S     | G<br>30 | S<br>0                                      |                 |               | 21         |
| A152V    | A<br>28 | V<br>2                                      | T<br>0          |               | 20         |
| A153V    | A<br>30 | V<br>0                                      | G Q T<br>0 0 0  |               | 20         |
| C193S    | C<br>30 | S<br>0                                      | F V<br>0 0      |               | 21         |
| A70T     |         |                                             | A G V<br>28 0 0 | T<br>2        | This study |
| A138V    |         |                                             | A T<br>28 0     | V<br>2        | This study |

\*Observed variants not present in the mutation library were searched against the NCBI database to determine if they were previously described (but not associated with resistance), and if found in NCBI they were described as “additional variants of the mutation”. Variants that were not detected previously in literature in the context of antibiotic resistance were referred to as “new variants.”

**Supplementary Table 9.** Mutations observed in the *rpoB* gene (previously described\* and novel mutations). After imperfect alignments were omitted, 46 of the total 48 sequences remained for analysis.

| Mutation | WT      | Published mutations                         |                                     | New variant | New mutation | Reference  |
|----------|---------|---------------------------------------------|-------------------------------------|-------------|--------------|------------|
|          |         | Likely associated with resistance phenotype | Additional variants of the mutation |             |              |            |
| V149F    | V<br>46 | F<br>0                                      |                                     |             |              | 23         |
| L525P    | L<br>46 | P<br>0                                      |                                     |             |              | 22         |
| Q527R\K  | Q<br>46 | R<br>0                                      |                                     |             |              | 24         |
| D530V    | D<br>45 | V<br>1                                      | N<br>0    E<br>0                    |             |              | 25         |
| H540N\Y  | H<br>46 | N<br>0                                      |                                     |             |              | 25         |
| S545L    | S<br>46 | L<br>0                                      |                                     |             |              | 22         |
| L547F**  | L<br>45 | F<br>0                                      |                                     |             |              | 26         |
| I586L\N  | I<br>46 | L<br>0    N<br>0                            |                                     |             |              | 22         |
| R701H    | R<br>45 | H<br>1                                      |                                     | C<br>0      |              | 25         |
| V783M    | V<br>44 |                                             |                                     |             | M<br>2       | This study |

\*Observed variants not present in the mutation library were searched against the NCBI database to determine if they were previously described (but not associated with resistance), and if found in NCBI they were described as “additional variants of the mutation”. Variants that were not detected previously in literature in the context of antibiotic resistance were referred to as “new variants.”

\*\* 45 out of 48 alignments were used in the analysis of this mutation.

## References.

1. Okamoto, T.; Yoshiyama, H.; Nakazawa, T.; Park, I.-D.; Chang, M.-W.; Yanai, H.; Okita, K.; Shirai, M. A change in PBP1 is involved in amoxicillin resistance of clinical isolates of *Helicobacter pylori*. *J. Antimicrob. Chemother.* **2002**, *50*, 849–856, doi:10.1093/jac/dkf140.
2. Rimbara, E.; Noguchi, N.; Kawai, T.; Sasatsu, M. Mutations in penicillin-binding proteins 1, 2 and 3 are responsible for amoxicillin resistance in *Helicobacter pylori*. *J. Antimicrob. Chemother.* **2008**, *61*, 995–998, doi:10.1093/jac/dkn051.
3. Gerrits, M.M.; Godoy, A.P.O.; Kuipers, E.J.; Ribeiro, M.L.; Stoof, J.; Mendonça, S.; Van Vliet, A.H.M.; Jr, J.P.; Kusters, J.G. Multiple Mutations in or Adjacent to the Conserved Penicillin-Binding Protein Motifs of the Penicillin-Binding Protein 1A Confer Amoxicillin Resistance to *Helicobacter pylori*. *Helicobacter* **2006**, *11*, 181–187, doi:10.1111/j.1523-5378.2006.00398.x.
4. Rimbara, E.; Noguchi, N.; Kawai, T.; Sasatsu, M. Correlation between Substitutions in Penicillin-Binding Protein 1 and Amoxicillin Resistance in *Helicobacter pylori*. *Microbiol. Immunol.* **2007**, *51*, 939–944, doi:10.1111/j.1348-0421.2007.tb03990.x.
5. Van Doorn, L.-J.; Debets-Ossenkopp, Y.J.; Marais, A.; Sanna, R.; Megraud, F.; Kusters, J.G.; Quint, W.G.V. Rapid Detection, by PCR and Reverse Hybridization, of Mutations in the *Helicobacter pylori* 23S rRNA Gene, Associated with Macrolide Resistance. *Antimicrob. Agents Chemother.* **1999**, *43*, 1779–1782, doi:10.1128/aac.43.7.1779.
6. Hao, Q.; Li, Y.; Zhang, Z.J.; Liu, Y.; Gao, H. New mutation points in 23S rRNA gene associated with *Helicobacter pylori* resistance to clarithromycin in northeast China. *World journal of gastroenterology.* **2004**, *10*, 1075.
7. Kim, J.M.; Kim, J.S.; Kim, N.; Kim, Y.-J.; Kim, I.Y.; Chee, Y.J.; Lee, C.-H.; Jung, H.C. Gene mutations of 23S rRNA associated with clarithromycin resistance in *Helicobacter pylori* strains isolated from Korean patients. *J. Microbiol. Biotechnol.* **2008**, *18*, 1584–1589.
8. Hansomburana, P.; Anantapanpong, S.; Sirinthornpunya, S.; Chuengyong, K.; Rojborwonwittaya, J. Prevalence of single nucleotide mutation in clarithromycin resistant gene of *Helicobacter pylori*: A 32-months prospective study by using hybridization real time polymerase chain reaction. *J. Med Assoc. Thai. = Chotmaihet thangphaet* **2012**, *95*.
9. Zhen-Hua, Z.; De-Qiang, H.; Yong, X.; Lin-Lin, L.; Nong-Hua, L. Characterization of 23S rRNA gene mutation in primary and secondary clarithromycin-resistant *Helicobacter pylori* strains from East China. *Turk. J. Gastroenterol.* **2009**, *24*, 5–9, doi:10.4318/tjg.2013.0525.
10. Moore, R.A.; Beckthold, B.; Wong, S.; Kureishi, A.; Bryan, L.E. Nucleotide sequence of the *gyrA* gene and characterization of ciprofloxacin-resistant mutants of *Helicobacter pylori*. *Antimicrob. Agents Chemother.* **1995**, *39*, 107–111, doi:10.1128/aac.39.1.107.
11. Cattoir, V.; Nectoux, J.; Lascols, C.; Deforges, L.; Delchier, J.-C.; Mégraud, F.; Soussy, C.-J.; Cambau, E. Update on fluoroquinolone resistance in *Helicobacter pylori*: New mutations leading to resistance and first description of a *gyrA* polymorphism associated with hypersusceptibility. *Int. J. Antimicrob. Agents* **2007**, *29*, 389–396, doi:10.1016/j.ijantimicag.2006.11.007.
12. Miiftahussurur, M.; Syam, A.F.; Nusi, I.A.; Makmun, D.; Waskito, L.A.; Zein, L.H.; Akil, F.; Uwan, W.B.; Simanjuntak, D.; Wibawa, I.D.N.; et al. Surveillance of *Helicobacter pylori* Antibiotic Susceptibility in Indonesia: Different Resistance Types among Regions and with Novel Genetic Mutations. *PLoS ONE* **2016**, *11*, e0166199, doi:10.1371/journal.pone.0166199.
13. Lauener FN, Imkamp F, Lehours P, Buissonnière A, Benejat L, Zbinden, R.; et al. Genetic determinants and prediction of antibiotic resistance phenotypes in *Helicobacter pylori*. *Journal of clinical medicine.* **2019**, *8*, 53.
14. Farzi, N.; Yadegar, A.; Sadeghi, A.; Aghdaei, H.A.; Smith, S.M.; Raymond, J.; Suzuki, H.; Zali, M.R. High Prevalence of Antibiotic Resistance in Iranian *Helicobacter pylori* Isolates: Importance of Functional and Mutational Analysis of Resistance Genes and Virulence Genotyping. *J. Clin. Med.* **2019**, *8*, 2004, doi:10.3390/jcm8112004.
15. Goodwin, A.; Kersulyte, D.; Sisson, G.; Van Zanten, S.J.O.V.; Berg, D.E.; Hoffman, P.S. Metronidazole resistance in *Helicobacter pylori* is due to null mutations in a gene (*rdxA*) that encodes an oxygen-insensitive NADPH nitroreductase. *Mol. Microbiol.* **1998**, *28*, 383–393, doi:10.1046/j.1365-2958.1998.00806.x.
16. Jenks, P.J.; Ferrero, R.L.; Labigne, A. The role of the *rdxA* gene in the evolution of metronidazole resistance in *Helicobacter pylori*. *Journal of Antimicrobial Chemotherapy.* **1999**, *43*, 753–758.
17. Kwon, D.H.; Hulten, K.; Kato, M.; Kim, J.J.; Lee, M.; El-Zaatari, F.A.K.; Osato, M.S.; Graham, D.Y. DNA Sequence Analysis of *rdxA* and *frxA* from 12 Pairs of Metronidazole-Sensitive and -Resistant Clinical *Helicobacter pylori* Isolates. *Antimicrob. Agents Chemother.* **2001**, *45*, 2609–2615, doi:10.1128/aac.45.9.2609-2615.2001.
18. Rasheed, F.; Campbell, B.J.; Alfizah, H.; Varro, A.; Zahra, R.; Yamaoka, Y.; et al. Analysis of clinical isolates of *Helicobacter pylori* in Pakistan reveals high degrees of pathogenicity and high frequencies of antibiotic resistance. *Helicobacter.* **2014**, *19*, 387–399.
19. Paul, R.; Postius, S.; Melchers, K.; Schafer, K.P. Mutations of the *Helicobacter pylori* Genes *rdxA* and *pbp1* Cause Resistance against Metronidazole and Amoxicillin. *Antimicrob. Agents Chemother.* **2001**, *45*, 962–965, doi:10.1128/aac.45.3.962-965.2001.
20. Kim, S.Y.; Joo, Y.M.; Lee, H.S.; Chung, I.-S.; Yoo, Y.-J.; Merrell, D.S.; Cha, J.-H. Genetic analysis of *Helicobacter pylori* clinical isolates suggests resistance to metronidazole can occur without the loss of functional *rdxA*. *J. Antibiot.* **2009**, *62*, 43–50, doi:10.1038/ja.2008.6.
21. Butlop, T.; Mungkote, N.; Chaichanawongsaraj, N. Analysis of allelic variants of *rdxA* associated with metronidazole resistance in *Helicobacter pylori*: Detection of common genotypes in *rdxA* by multiplex allele-specific polymerase chain reaction. *Genet. Mol. Res.* **2016**, *15*, 3, doi:10.4238/gmr.15038674.
22. Heep, M.; Beck, D.; Bayerdoerffer, E.; Lehn, N. Rifampin and Rifabutin Resistance Mechanism in *Helicobacter pylori*. *Antimicrob. Agents Chemother.* **1999**, *43*, 1497–1499, doi:10.1128/aac.43.6.1497.

23. Heep, M.; Rieger, U.; Beck, D.; Lehn, N. Mutations in the beginning of the rpoB Gene can induce resistance to Rifamycins in both helicobacter pylori and mycobacterium tuberculosis. *Antimicrobial agents and chemotherapy*. 2000, *44*, 1075–1077.
24. Glocker, E.; Bogdan, C.; Kist, M. Characterization of rifampicin-resistant clinical Helicobacter pylori isolates from Germany. *J. Antimicrob. Chemother.* **2007**, *59*, 874–879, doi:10.1093/jac/dkm039.
25. Heep, M.; Odenbreit, S.; Beck, D.; Decker, J.; Prohaska, E.; Rieger, U.; Lehn, N. Mutations at Four Distinct Regions of the rpoB Gene Can Reduce the Susceptibility of Helicobacter pylori to Rifamycins. *Antimicrob. Agents Chemother.* **2000**, *44*, 1713–1715, doi:10.1128/aac.44.6.1713-1715.2000.
26. Hays, C.; Burucoa, C.; Lehours, P.; Tran, C.T.; Leleu, A.; Raymond, J. Molecular characterization of Helicobacter pylori resistance to rifamycins. *Helicobacter*. 2018, *23*, e12451.
27. Kageyama, C.; Sato, M.; Sakae, H.; Obayashi, Y.; Kawahara, Y.; Mima, T.; Matsushita, O.; Yokota, K.; Mizuno, M.; Okada, H. Increase in antibiotic resistant Helicobacter pylori in a University Hospital in Japan. *Infect. Drug Resist.* **2019**, *12*, 597–602, doi:10.2147/idr.s196452.
28. Arévalo, A.; Otero, W.; Trespalacios, A.A. Helicobacter pylori: Resistencia múltiple en pacientes de Bogotá, Colombia. *Biomédica*. **2019**, *39*, 125–134.
29. De Palma, G.Z.; Mendiondo, N.; Wonaga, A.; Viola, L.; Ibarra, D.; Campitelli, E.; Salim, N.; Corti, R.; Goldman, C.; Catalano, M. Occurrence of Mutations in the Antimicrobial Target Genes Related to Levofloxacin, Clarithromycin, and Amoxicillin Resistance in Helicobacter pylori Isolates from Buenos Aires City. *Microb. Drug Resist.* **2017**, *23*, 351–358, doi:10.1089/mdr.2015.0361.
30. Eng, N.F.; Ybazeta, G.; Chapman, K.; Fraleigh, N.L.; Letto, R.; Altman, E.; Diaz-Mitoma, F. Antimicrobial susceptibility of Canadian isolates of Helicobacter pylori in Northeastern Ontario. *Can. J. Infect. Dis. Med. Microbiol.* **2015**, *26*, 137–144.
31. Bachir, M.; Allem, R.; Benejat, L.; Tifrit, A.; Medjekane, M.; Drici, A.E.-M.; Megraud, F.; Doudi, K.T. Molecular detection of mutations involved in Helicobacter pylori antibiotic resistance in Algeria. *J. Antimicrob. Chemother.* **2018**, *73*, 2034–2038, doi:10.1093/jac/dky167.
32. Tankovic, J.; Lascols, C.; Sculo, Q.; Petit, J.-C.; Soussy, C.-J. Single and Double Mutations in gyrA but Not in gyrB Are Associated with Low- and High-Level Fluoroquinolone Resistance in Helicobacter pylori. *Antimicrob. Agents Chemother.* **2003**, *47*, 3942–3944, doi:10.1128/aac.47.12.3942-3944.2003.
33. Secka O, Berg DE, Antonio M, Corrah T, Tapgun M, Walton R, et al. Antimicrobial susceptibility and resistance patterns among Helicobacter pylori strains from The Gambia, West Africa. *Antimicrob. agents Chemother.* . 2013, *57*, 1231–1237.
34. Teh, X.; Khosravi, Y.; Lee, W.C.; Leow, A.H.R.; Loke, M.F.; Vadivelu, J.; Goh, K.L. Functional and Molecular Surveillance of Helicobacter pylori Antibiotic Resistance in Kuala Lumpur. *PLoS ONE* **2014**, *9*, e101481, doi:10.1371/journal.pone.0101481.
35. Miiftahussurur, M.; Cruz, M.; Subsomwong, P.; Abreu, J.A.J.; Hosking, C.; Nagashima, H.; Akada, J.; Yamaoka, Y. Clarithromycin-Based Triple Therapy is Still Useful as an Initial Treatment for Helicobacter pylori Infection in the Dominican Republic. *Am. J. Trop. Med. Hyg.* **2017**, *96*, 1050–1059, doi:10.4269/ajtmh.16-0729.
36. Heep M, Lehn N, Brandstätter B, Rieger U, Senzenberger, S.; Wehr, W. Detection of rifabutin resistance and association of rpoB mutations with resistance to four rifamycin derivatives in Helicobacter pylori. *Eur. J. Clin. Microbiol. Infect. Dis.* 2002, *21*, 143.
37. Mori, H.; Suzuki, H.; Matsuzaki, J.; Masaoka, T.; Kanai, T. Acquisition of double mutation in gyrA caused high resistance to sitafloxacin in Helicobacter pylori after unsuccessful eradication with sitafloxacin-containing regimens. *United Eur. Gastroenterol. J.* **2018**, *6*, 391–397, doi:10.1177/2050640617737215.
